# Supplementary material for: New technology for post-combustion abatement of carbon dioxide via an in situ generated superoxide anion-radical
Source: Royal Society of Chemistry journal article supplement (doi:10.1039/c4ra03844d), 2014-01-01
Supplement: c4ra03844d1.pdf [file c4ra03844d1.pdf]

### Supporting information

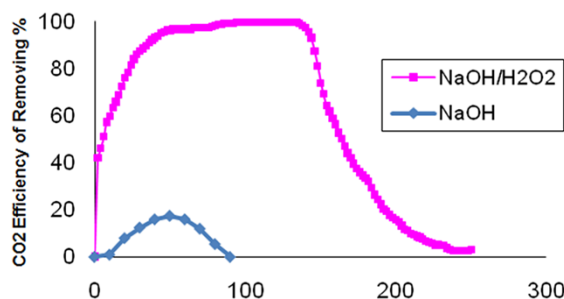

**Figure S1:** Hydroxide vs. superoxide as CO<sub>2</sub> absorber under identical conditions. Reaction conditions: 0.25 mol sodium hydroxide, 0.375 mol hydrogen peroxide vs. 0.25 mol sodium hydroxide at room temperature and with CO<sub>2</sub> flow rate of 1 lit/min, the scrubber contains 30 ml distilled water.

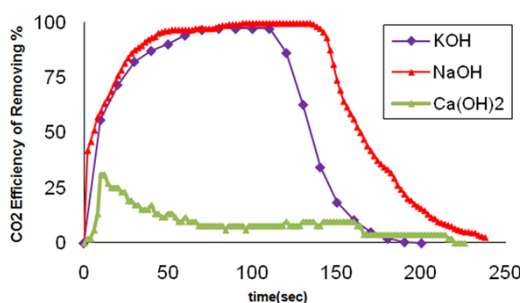

**Figure S2:** Abatement of CO<sub>2</sub> by different bases combined with hydrogen peroxide. Reaction conditions: 0.25 mol alkaline in 30 ml distilled water, 0.375 mol of hydrogen peroxide at room temperature and standard pressure, CO<sub>2</sub> flow rate of 1 lit/min.

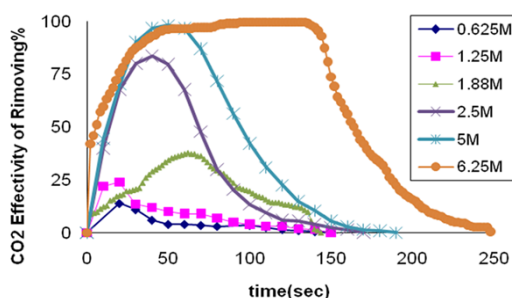

**Figure S3:** CO<sub>2</sub> absorption as function of sodium hydroxide concentration. Reaction conditions: 0.625-6.25 M of sodium hydroxide, 0.375 mol of hydrogen peroxide at 30 ml of distilled water and CO<sub>2</sub> flow rate of 1 lit/min, at room temperature and standard pressure.

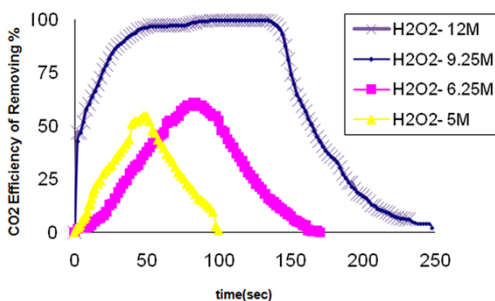

**Figure S4:** Carbon dioxide absorption as function of initial H<sub>2</sub>O<sub>2</sub> concentration. Reaction conditions: 0.25 mol of alkaline in 30

ml distilled water and CO<sub>2</sub> flow rate of 1 lit/min, at room temperature and standard pressure.

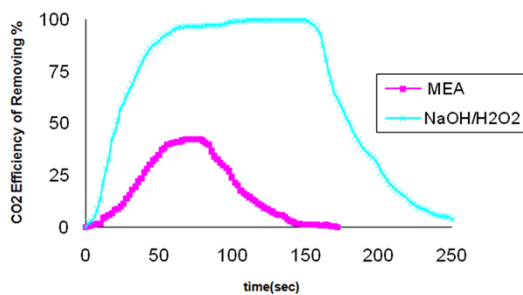

**Figure S5:** Superoxide vs. MEA absorption of CO<sub>2</sub>. Reaction conditions: 0.25 mol sodium hydroxide in 30 ml distilled water, 0.375 mol of 30% hydrogen peroxide, total volume of 42 ml and CO<sub>2</sub> flow rate 1 lit/min. MEA: 0.5 mol in water, total volume of 42 ml, CO<sub>2</sub> flow rate 1 lit/min.

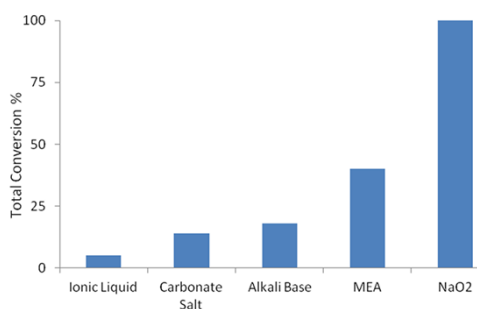

**Figure S6:** Total conversion in different CO<sub>2</sub> absorption scrubbers. Reaction conditions: 0.25 mol of sodium hydroxide or sodium carbonate, 0.5 mol of MEA or ionic liquid (BMIMF) and 0.25 mol of superoxide at CO<sub>2</sub> flow rate of 1 lit/min.

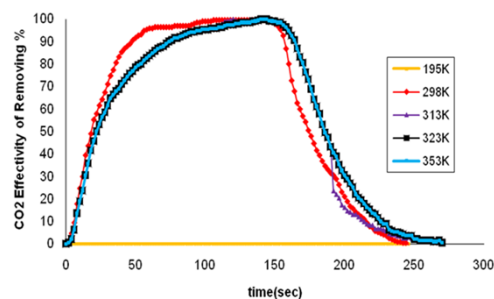

**Figure S7:** CO<sub>2</sub> absorption reactions as function of initial reaction temperature. Reaction conditions: 0.25 mol alkaline in 30 ml distilled water, 0.375 mol of hydrogen peroxide with temperature gradient and CO<sub>2</sub> flow rate of 1 lit/min.

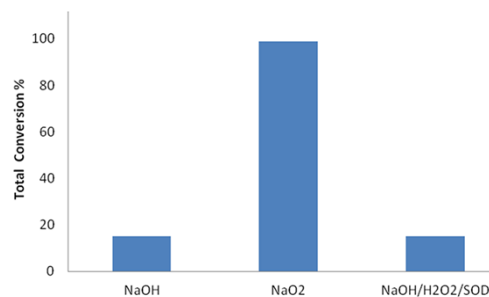

**Figure S8:** Effectiveness of CO<sub>2</sub> absorption as function of SOD enzyme addition. Two minutes test. Reaction conditions: 0.25 mol alkaline in 30 ml distilled water, 0.375 mol of hydrogen peroxide, 6U of SOD and CO<sub>2</sub> flow rate of 1 lit/min.

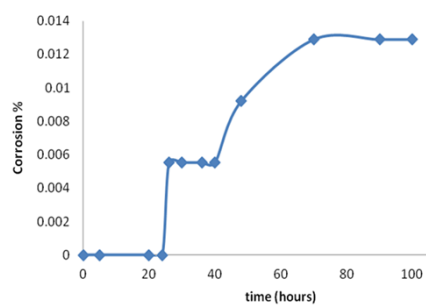

**Figure S9:** The gravimetric measurement of pipe corrosion in presence of superoxide reagent. Reaction conditions: 1 mol sodium hydroxide, 2 mol hydrogen peroxide, 500 ml of water, type of metal test CS 1010, reaction time 100 hours. The corrosion was measured by gravimetric measurements.

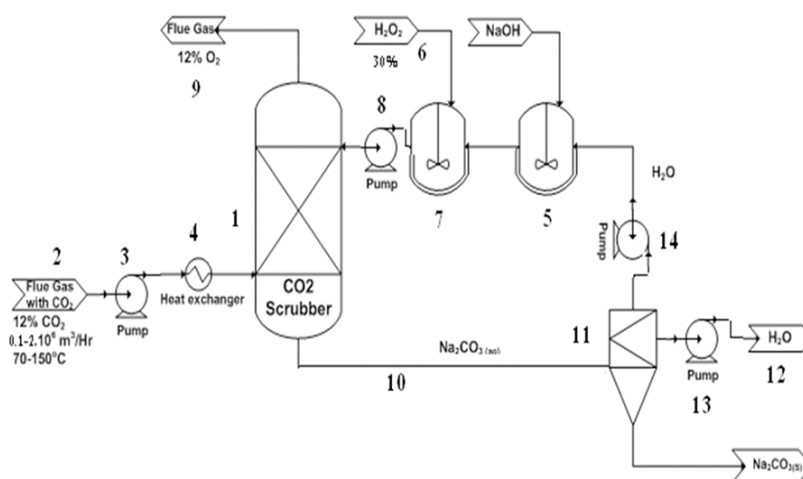

**Figure S10:** Illustrates a scrubbing apparatus suitable for carrying out the process of the invention.
